# Supplementary material
Source: MDPI journal article supplement (https://www.mdpi.com/2073-445X/8/5/83)
Supplement: s1 [file s1]

**TECHNICAL UNIVERSITY OF CRETE  
SCHOOL OF PRODUCTION ENGINEERING AND  
MANAGEMENT**

**THE LANDCAPE CONCEPT IN THE COMMUNITY OF THE TECHNICAL  
UNIVERSITY OF CRETE**

*JANUARY 2012/2017*

This research survey is undertaken by the School of Production Engineering and Management of the Technical University of Crete, by ms Angeliki Papadaki, post-graduate student, in the context of her graduate thesis, under the supervision of Assistant Professor Tryfon Daras.

The questionnaire was designed with the purpose of reporting the students' knowledge of the landscape context, as well as their perceptions and attitudes towards landscape education in the academic curricula of our Technical University.

Please, be assured that no personal information or data are required and your participation in this research survey is completely anonymous. The research is in accordance with all the requirements concerning ethics issues and personal data issues and the results will be used exclusively for statistical purposes, by the researchers themselves.

Thank you for your cooperation and participation in this research.

**The Scientifically Responsible Parties**

## Section 1 – General Information

Please, mark with X your response in the corresponding (one or more, if you wish) squares.

1. Gender                               .....Male               .....Female
2. Department/School               .....Environmental Engineering  
                                             .....Electrical and Computer Engineering  
                                             .....Production Engineering and Management  
                                             .....Architecture  
                                             .....Mineral Resources Engineering
3. Year of study                       .....1st-2nd       ..... ≥3rd       ..... Other

## Section 2 – Knowledge of the Landscape Concept

4. What is your first thought, when you hear the word “landscape”?  
.....
5. A landscape is perceived through: ....sight       ....hearing       ...smell       ...touch  
                                             ....taste       ....all of the above       ....I do not know
6. In your opinion, a landscape results from :
- .....simple observation       .....observation and participation       .....I do not know
7. What does the word landscape refers to most?”
- .....the countryside       .....the sea       .....mountains       .....the forest  
.....the village       .....the city       .....all of the above       .....other  
.....I do not know
8. Do you think that when the human being intervenes in a natural landscape, it ceases being a landscape?  
                                             .....Yes       .....No       .....I do not know
9. Do you consider these as landscapes or not?
- .....abandoned industrial area       .....billboards along a national highway       .....a vineyard  
.....rural terraces       .....square at peak time       ..... an old town  
.....a burned forest       .....none of the above       .....all of the above  
..... I do not know
10. Do you think that landscape is tied to cultural traditions?  
                                             .....Yes       .....No       .....I do not know
11. What sorts of landscapes are there, according to your opinion?
- ....beautiful       .....ugly       .....ordinary  
      ....indifferent       .....degraded       .....other
12. Do you often use the word “landscape” in your vocabulary?  
                                             .....Yes       .....No
13. If Yes :       .....only literally       .....literally and metaphorically
14. Give an example of literal use and one of metaphorical use  
.....

### Section 3 – Landscape and Education

15. Have you ever been taught any courses related to landscape? If yes, where?

.... Secondary Education      ..... Post-secondary education  
.... Tertiary Education      ..... Elsewhere      ..... Nowhere

16. Do you think that it is important for an engineer to be taught courses relating to landscape?

....Yes      ....No

If Yes, why? .....

17. If Yes, in which year of engineering studies?

.....

18. If Yes, you would like such courses to consist of:

....case studies      ..... theory, or theory and exercises      .... other content

### Section 4 – Attitudes and Proposals

19. How would you characterize the landscape of the Technical University of the Crete Campus?

....very attractive      ....attractive      ....indifferent      .....ugly      ....very ugly      ....no answer

Why? .....

20. Since when do you know the University Campus of Technical University of Crete?  
[\* only in the 2017 questionnaire]

.....

How do you evaluate the University Campus landscape presently compared to 6 years ago? Why? [\* only in the 2017 questionnaire]

.....

21. Do you consider landscape knowledge important, overrated or a luxury for an engineer?

.....important      .....overrated      .....luxury      .....all the above      .....none of the above

If important, why?

22. Would you participate in future re-planning or improving the Campus landscape?

....Yes      .....No

23. What else do you consider important, concerning the Campus landscape, or landscape in general?

.....

**Thank you**
